## **Help-seeking behavior for problematic substance uses in Bahir Dar town, North-West Ethiopia**

Habte Belete <sup>1\*</sup>, Tesfa Mekonen<sup>1</sup>, Wubalem Fekadu<sup>1</sup>, Getasew Legas<sup>2</sup>, Asmamaw Getnet<sup>3</sup>

### **Affiliations**

<sup>1</sup>Psychiatry Department, College of medicine and health Sciences, Bahir Dar University, Amhara, Ethiopia; <sup>2</sup>Psychiatry Department, College of medicine and health Sciences, Debre Tabor University, Amhara, Ethiopia; <sup>3</sup>Psychiatry Department, College of medicine and health Sciences, Debre Markos University, Amhara, Ethiopia

**\*Correspondence:** Habte Belete

Psychiatry Department, college of Medicine and health sciences, Bahir Dar University, Bahir Dar, PO Box 79, Ethiopia

Phone: +251918039937

Fax +251 58 220 5932

Email: [habte.belete@gmail.com](mailto:habte.belete@gmail.com)

**Email addresses:** TM: [smarthope1@gmail.com](mailto:smarthope1@gmail.com); WF: [wubfek@gmail.com](mailto:wubfek@gmail.com); GL: [getasewlegas@gmail.com](mailto:getasewlegas@gmail.com); AG: [assmamaw11@gmail.com](mailto:assmamaw11@gmail.com)

## **Abstract**

**Background:** Mental, neurological and substance use disorders are common, but 76% to 85% of people with those disorders in low and middle-income countries did not receive treatment.

**Objective:** Our objective was to assess the level of help seeking behavior and associated factors among residents with problematic substance uses (alcohol, khat, tobacco and hashish).

**Methods:** Community based cross sectional study was conducted in Bahir Dar town among total of 548 participants with problematic substance users. We had interviewed for help seeking behavior by pre-tested modified General Help Seeking Questionnaire. Logistic regression was done and p-value < 0.05 was used for declaration of significant level. Adjusted odds ratios (AOR) and 95% confidence intervals (CI) have been used.

**Results:** Among five hundred and forty-eight participants with problematic substance users, only one hundred and sixty-eight (30.7%) sought help for their substance related problems. Participants' age above 35 years [AOR = .47 95% CI (.25, .90)], positively screened for common mental disorders [AOR = 4.12, 95% CI (2.7, 6.3)], comorbid medical [AOR = 3.0, 95% CI (1.7, 5.3)], and grand-families' history of substance user [AOR = 2.18, 95% CI (1.4, 3.4)] found significantly associated with help seeking.

**Conclusion:** There was low proportion of help seeking behavior among participants with problematic substance users. Advanced age was a barrier to seek help while medical illnesses, common mental disorders and history of substance use in grand families were found to enforce to seek help.

**Key words:** help seeking, problematic substance use, urban, Ethiopia, low-income country

## **Introduction**

Mental, neurological and substance use disorders are common; approximately one in four families has at least one member with a mental disorder which is accounted for 14% of the global burden of disease. Globally about 190 million drug users were reported and of them 40 million serious drug related illnesses or injuries were identified each year [1]. For example alcohol alone contributes for 7.6% males and 4% females of deaths whereas it contributes to more than 200 alcohol related diseases (alcohol related injuries, alcohol dependence, liver cirrhosis, and cancers) [2, 3]. However, 76% to 85% of people with Mental, neurological and substance use disorders in low and middle-income countries did not receive treatment for their behavioral problems [4-6].

Help-seeking is an adaptive coping process that is the attempt to obtain external assistance to deal with a mental health concern formally or informally. Formal help-seeking is assistance from professionals whereas informal help-seeking is assistance from informal social networks, such as friends and families [7]. In Ethiopia substance use in the community [8] and in university students has many social and academic related problems [9-11]. Despite the high prevalence of substance related problems, most people do not access professional health help. For instance, WHO reported that universally alcohol use disorder has a widest treatment gap (78.1%). However, problematic substance use is remaining a major public health concern and barriers to treatment for problematic substance uses have not been well searched in developing world [12]. There are evidences in which environmental factors serve as barriers to seek help for substance related behavioral disturbances in the community [13]. According to WHO report individual factors like, personal motivation, perception of need, lack of health insurance, internalized gender norms, and perceptions of social supports

as positive, and others influence the help-seeking behaviour of adolescents' [14]. From A community study among people with mental disorders including, alcohol use disorders, only 31.7% of them had sought help. From this report 15.7% help sought was from mental health providers, 8.4% from general practitioners, and 7.6% from religious/ spiritual advisors or other healers [15]. Professional help seeking behaviors among problematic drug user lesbian and bisexual women was only 41.5% [16]. Among people with alcohol use disorders 7% of them seek help from any mental health professional; 5.8% from medical health professional; 7.2% from a social support setting and 4.5% from any religious or spiritual advisor/healer [15]. Among patients who visited traditional healers for their mental health problems, 41% was visited to seek help for substance use disorders [17].

Factors related to enrolling in substance abuse treatment are multiple and researchers had blamed factors like lack of availability, transportation, and insurance [18]. Even though, men report higher levels of substance abuse than women and are more likely to have psychosocial problems, but are less likely to seek help [19]. Older adults' positive attitudes and treatment beliefs were enabling to use mental health services [20]. Negative beliefs about the quality and effectiveness of treatment had a negatively effect to access services [21]. Reluctance to give up the substance; reluctance to admit the need for help and inability to afford treatment were contribute to poor help-seeking behavior [22]. Even if the magnitude of substance abuse in Ethiopia reaches 22.8% in the general population [23]; as per our best knowledge there is no publishing data to show prevalence and factors that associated with help seeking behaviour among problematic substance users in Ethiopia. Therefore, the purpose of this study was to see the level of help seeking behaviour and its contributing factor among problematic substance users in urban residents.

## **Methods**

### **Study settings**

We were conducted a community based cross-sectional study in Bahir Dar town which is located in Northwest Ethiopia around 565 kilo meters from Addis Ababa. The city has a total of 180,174 populations; of these 93,014 are females. Currently, there are four hospitals, ten health centers and a number of other private health institutions (clinics, pharmacies and drug shops). In this city alcohol and khat use are common among adolescents.

### **Participants**

Source population was all permanent residents in the city. Study population was those positively screened for problematic substance use and whose age 18 and above were including in the study. A participant who cannot communicate was not included in the study. Sample size was determined with a single population formula by using proportion of help seeking for problematic substance uses among residents 41% [17], 4% margin of error, and 95% confidence interval. We select four kebeles using lottery method from the total 17 kebeles. Then house-holds were selected proportionally from each selected kebeles. Finally the data has been collected at household level. Individual participants were selected based on their status of a problematic substance uses in the family. We interviewed 548 participants who were positive for problematic substance uses (Khat, alcohol, tobacco and cannabis) in the community. Data was collected by degree holder nurses with a self-administered questionnaire which was translated into Amharic version (local working language).

### **Measurements**

First the participants were screened for problematic substance uses by using CAGE AID questionnaire. CAGE AID has been developed to identify problematic substance uses in the community and has four items. Scoring of two or greater positive answers from the four questions to social drugs screening tool was considered as problematic substance uses [24]. CAGE-AID is derived from the four questions of the tool: Cut down, Annoyed, Guilty, and Eye-opener. Each has “yes and no” response that valued one point (1) and zero (0). This tool helps to screen the presence of problematic substance uses in the community. Help seeking was assessed if individuals sought assistance for their substance related problems from delineate formal and informal source [7]. Help seeking behavior among problematic substance users assessed by using modified General Help Seeking Questionnaire (GHSQ). It assesses whether help was sought or not and the potential sources of that help for the last 12 months. GHSQ has good validity, reliability, and reliability (chronbach’s alpha = 0.83) [25] and we did a pre-test for our study and has internal consistency (chronbach’s alpha = 0.80). Social support assessed by using oslo-3 social support scale that consist three items [26]. Common mental disorder was considered when adults who score 11 or more symptoms of the 20 self-reporting questionnaire in the last one month. The self-reporting questionnaire developed to screening the presence of common mental disorders among community participants and developed by WHO [27]. Income was assessed by using relative income by leveling their own income as less than others; similar to others and better than others. Education was categorized in uneducated (who were unable to read and write); and educated (which were able to read and write). Clinical variables like, co morbid diagnosis medical illnesses were assessed by asking the participants, if they had a diagnosis of medical illnesses before the survey.

## Analysis

After the data was checked for completeness and consistency, it was coded and entered in the Epi-Data 3.1 software. Data was exported to SPSS for analysis and p-value less than 0.05 was declaration of a statistically significant. Bivariate and multivariate logistic regression analyses had done to identify determinants of help seeking behavior for substance use related problems.

## Ethical clearance

Ethical clearance was obtained from Ethical Review committee of college of medicine and health sciences, Bahir Dar University. Formal permission letter was taken from administrative of the city and written consent was taken from the participants. All participants who were problematic substance users referred to clinic for better screening to mental and medical illnesses. Those who were positive for screening of common mental disorders were link with psychiatric clinics

## Results

A total of 548 residents who problematic substance uses were included in the study and 422 (77%) of them were males. The median age of participants was 27 years and substantial number of them were living alone, 241 (44%) (table1).

Table1: Socio-demographic characteristics and help seeking behavior among problematic substance users in North-West Ethiopia (n=548)

| Characteristics | Help seeking behavior |     | Overall (%) | Chisq test( $\chi^2$ ) (p-value) |
|-----------------|-----------------------|-----|-------------|----------------------------------|
|                 | Yes                   | No  |             |                                  |
| <b>Sex</b>      |                       |     |             |                                  |
| Male            | 135                   | 287 | 422(77%)    | 1.5(.21)                         |
| Female          | 33                    | 93  | 126(23%)    |                                  |

|                               |     |     |             |           |
|-------------------------------|-----|-----|-------------|-----------|
| <b>Education</b>              |     |     |             |           |
| Uneducated                    | 39  | 62  | 101(18.4%)  | 3.7(.05)  |
| Educated                      | 129 | 318 | 447(81.6%)  |           |
| <b>Ethnicity</b>              |     |     |             |           |
| Amhara                        | 131 | 304 | 435(79.4%)  | .3(.58)   |
| Others*                       | 37  | 76  | 113(20.6%)  |           |
| <b>Age</b>                    |     |     |             |           |
| 18-24                         | 56  | 106 | 162 (29.6%) | 5.5 (.06) |
| 25-35                         | 91  | 196 | 287(52.4%)  |           |
| >35                           | 21  | 78  | 99(18.1%)   |           |
| <b>Current marital status</b> |     |     |             |           |
| Married                       | 38  | 105 | 143(26.1%)  | 1.5(.22)  |
| Unmarried                     | 130 | 275 | 405(73.9%)  |           |
| <b>Relative wealth</b>        |     |     |             |           |
| Lower                         | 78  | 148 | 226(41.2%)  | 2.7(.25)  |
| Same                          | 73  | 191 | 264(48.2%)  |           |
| Better                        | 17  | 41  | 58(10.6%)   |           |
| <b>Living circumstance</b>    |     |     |             |           |
| With family                   | 103 | 204 | 307(56%)    |           |
| Alone                         | 65  | 176 | 241(44%)    | 2.7(.09)  |
| <b>Job</b>                    |     |     |             |           |
| Yes                           | 78  | 188 | 266(48.5%)  | .4(.51)   |
| No                            | 90  | 192 | 282(51.5%)  |           |

\*(Oromo, Tigray, Gurage)

From total participants one hundred sixty one (29.4%) had substance user family members; two hundred forty (37.2%) had substance user friends and three hundred nineteen (58.2%) had history of substance use among their grandparents. Two hundred three (37%) problematic substance users had found with poor social support and one hundred forty nine (27.2%) had common mental disorders (table 2).

Table 2: psychosocial factors related to help seeking behavior among problematic substance users in North-West Ethiopia (n=548)

| Characteristics                                 | Help seeking behavior |     | Overall (%) | Chisq test (X <sup>2</sup> ) (p-value) |
|-------------------------------------------------|-----------------------|-----|-------------|----------------------------------------|
|                                                 | Yes                   | No  |             |                                        |
| <b>History of substance use in grand family</b> |                       |     |             |                                        |
| Yes                                             | 125                   | 194 | 319(41.8%)  | 26.1(.000)                             |
| No                                              | 43                    | 186 | 229(58.2%)  |                                        |
| <b>Who had substance user friend</b>            |                       |     |             |                                        |
| Yes                                             | 78                    | 126 | 204(37.2%)  | 8.8(.003)                              |



|                                                |     |     |            |            |
|------------------------------------------------|-----|-----|------------|------------|
| No                                             | 90  | 254 | 344(62.8%) |            |
| <b>Substance use leads economic crisis</b>     |     |     |            |            |
| Yes                                            | 124 | 269 | 393(71.7%) | .5(.46)    |
| No                                             | 44  | 111 | 155(28.3%) |            |
| <b>Common mental disorders</b>                 |     |     |            |            |
| Yes                                            | 85  | 64  | 149(27.2%) | 67.0(.000) |
| No                                             | 83  | 316 | 399(72.8%) |            |
| <b>Medical illnesses</b>                       |     |     |            |            |
| Yes                                            | 38  | 33  | 71(13%)    | 20.0(.000) |
| No                                             | 130 | 347 | 477(87%)   |            |
| <b>Think on substance cause mental illness</b> |     |     |            |            |
| Yes                                            | 131 | 278 | 409(74.6%) | 1.4(.23)   |
| No                                             | 37  | 102 | 139(25.4%) |            |
| <b>Level of social support</b>                 |     |     |            |            |
| Poor                                           | 71  | 132 | 203(37%)   | 3.8(.15)   |
| Moderate                                       | 81  | 195 | 276(50.4%) |            |
| Good                                           | 16  | 53  | 69(12.6%)  |            |

### **Magnitude of help seeking behavior**

Only one hundred and sixty eight (30.7%) sought help for their substance related behavioral disturbance among five hundred forty eight problematic substance users. Most of them were sought help from the informal source. Among these one hundred and twenty four (22.6%) sought help from their love; one hundred ten (20.1%) from their friends; one hundred and three (18.8%) from their families; eighty four (15.3%) from their relatives; and one hundred (18.2%) from religious institutes. From the formal help seekers ninety (16.4%) sought help from mental health professionals; and eighty nine (16.2%) from general medical practitioner.

In terms on their mental health status among help seekers, 50.6% had common mental disorders, 42.3% had poor social support and 9.5% had strong social support. Among help seekers gender difference was examined and 32% male and 26.2% females were sought help.

### **Multivariate analysis**

After bivariate and multivariate analysis of help seeking behavior in relation to all independent variables; advanced age, comorbid medical illnesses, had grand-parents with history of substance use, and positively screened for common mental disorders were found to be statistically significant (table 3).

Table 3: Factors association with help seeking behavior among problematic substance users, North-West Ethiopia (n=548)

| Variables                                       | Help seeking behavior |     | (Crude odd ratio)<br>(95% CI) | AOR<br>95% CI      | p-value |
|-------------------------------------------------|-----------------------|-----|-------------------------------|--------------------|---------|
|                                                 | Yes                   | No  |                               |                    |         |
| <b>Age in years</b>                             |                       |     |                               |                    |         |
| 18-24                                           | 56                    | 106 | 1.00                          | 1.00               |         |
| 25-35                                           | 91                    | 196 | .88 (.58, 1.32)               | .89 (.57, 1.41)    | .63     |
| >35                                             | 21                    | 78  | .51 (.28, .91)                | .47 (.25, .90)*    | .022    |
| <b>Common mental disorders</b>                  |                       |     |                               |                    |         |
| Yes                                             | 85                    | 64  | 5.0 (3.37, 7.58)              | 4.12 (2.7, 6.3)*   | .000    |
| No                                              | 83                    | 316 | 1.00                          | 1.00               |         |
| <b>Medical illnesses</b>                        |                       |     |                               |                    |         |
| Yes                                             | 38                    | 33  | 3.1 (1.85, 5.11)              | 3.00 (1.69, 5.34)* | .000    |
| No                                              | 130                   | 347 | 1.00                          | 1.00               |         |
| <b>History of substance use in grand family</b> |                       |     |                               |                    |         |
| Yes                                             | 125                   | 194 | 2.8 (1.87, 4.16)              | 2.18 (1.42, 3.37)* | .000    |
| No                                              | 43                    | 186 | 1.00                          | 1.00               |         |
| <b>Had substance user friend</b>                |                       |     |                               |                    |         |
| Yes                                             | 78                    | 126 | 1.7 (1.2, 2.5)                | 1.43(.95, 2.16)    | .087    |
| No                                              | 90                    | 254 | 1.00                          | 1.00               |         |

\* (significance at P value <.05) and 1.00 (reference)

## Discussion

Even though 190 million drug users were reported globally and 40 million of them suffer from serious drug related illnesses each year [1], we found only 30.7% of the participants were sought help for their substance related behavioral disturbance. The care of people with

behavioral disorders is a growing public health concern in the globe. However, 76% to 85% of people with mental, neurological and substance use disorders in low and middle-income countries not receive treatment [4-6]. This study coincides with the previous global report which stated low treatment seeking behavior in poor income countries. This result coincides with study done in Singapore 31.7% [15], but less than Los Angeles study 41.5% [16] and South African study 41% [17]. Even formal help seeking behavior in this study (16.4% from mental health professionals) found similar with Singapore study (15.7% from mental health providers) [15]. However, help seeking from general medical practitioner found higher in this study (16.2%) than Singapore (8.4%). Even though many psycho-social determinants accountable for the discrepancy of magnitude of help seeking behaviour, generally modern help seeking behavior looks low in developing countries.

Participants' age above 35 years found negatively associated with help seeking behavior and decreased by 53% of their need to get help [AOR = .47 95% CI (.25, .90)]. This contradicted with a previous study that stated older adults were seeking more mental health services than Youngers [20]. Elder adults may not have a good family support to motivate them to get assistance for their behavioral disturbance. Participants who screened positively for common mental disorders found four times more help seeker than those who hadn't common mental disorders [AOR = 4.12, 95% CI (2.7, 6.3)]. This may be due to the co-morbid effect of common mental disorders with substance related behavioral disturbance on their daily activities that leads to unable to control by their own capacity. The dual effect on their mental and behavioral status become severs and may push them to seek help. This finding agrees with the studies done in America [28, 29]. Comorbid diagnosis medical illness was identified as the determinant factor for help seeking behavior among problematic substance users.

Problematic substance users with comorbid medical illnesses were three times more likely to sought help than participants free of comorbid medical illnesses [AOR = 3.0, 95% CI (1.7, 5.3)]. This comorbidity may result perceived fear of death or other complications among participants and/or family members which give alarm to sought help from others. This finding agrees with previous study in America [30].

History of substance use in grand-families had a significant association with help seeking behavior among problematic substance users. Help seeking behavior found two times more common among problematic substance users who had grand-families with history of substance use than who hadn't [AOR = 2.18, 95% CI (1.4, 3.4)]. The historical impact of substance related behavioral disturbance in the family system (in terms of morbidity and mortality) may perceived by the family members and this might motivated substance users to sought help to prevent further disabilities in the family.

### **Conclusion and policy implication**

This finding comes with low proportion of help seeking behavior among problematic substance uses for their substance related behavioral disturbances. It was found in line with WHO global report which stated 76% to 85% of people with Mental, neurological and substance use disorders in low and middle-income countries did not receive treatment. Advanced age was found a barrier to seek help while common mental disorders and history of substance use in grand families were found enforce to seek help. It is better to create awareness for potential complications of problematic substance uses and encourage substance users to visit mental health service in the community.

### **Strengths and limitations of this study**

We had tried to select participants with problematic substance users that non-problematic substance users. We have a limitation and the study was conducted in urban and lack of representation for the rural settings which may be the least help seeking behaviour can observed. We recommended for future studies shall be conducted in the rural part of Ethiopia.

### **Acronyms**

CAGE - Cut down, Annoyed, Guilty, and Eye-opener

GHSQ - General Help Seeking Questionnaire

SPSS – Stasticaly Package for Social Science

USA – United State of America

WHO – World Health Organization

### **Ethics approval and consent to participate**

Ethical clearance was obtained from Ethical Review Committee of college of medicine and health sciences, Bahir Dar University. Written consent taken from the participants.

### **Consent for publication**

Not applicable

### **Availability of data and material**

Data sets are available with author for reasonable request

### **Competing interests**

We declare that there is no competing interest

## Funding

Funding was granted from Bahir Dar University

## Authors' contributions

All authors perform the design of the study, statistical analyses and draft the manuscript.

All authors review and approve the final manuscript

## Acknowledgements

We acknowledge the study participants for their genuine participations

## Reference

1. Whiteford HA, Degenhardt L, Rehm J, Baxter AJ, Ferrari AJ, Erskine HE, Charlson FJ, Norman RE, Flaxman AD, Johns N: **Global burden of disease attributable to mental and substance use disorders: findings from the Global Burden of Disease Study 2010.** *The Lancet* 2013, **382**(9904):1575-1586.
2. Lim SS, Vos T, Flaxman AD, Danaei G, Shibuya K, Adair-Rohani H, AlMazroa MA, Amann M, Anderson HR, Andrews KG: **A comparative risk assessment of burden of disease and injury attributable to 67 risk factors and risk factor clusters in 21 regions, 1990–2010: a systematic analysis for the Global Burden of Disease Study 2010.** *The lancet* 2012, **380**(9859):2224-2260.
3. Fleischmann A, Fuhr D, Poznyak V, Rekke D: **World Health Organization Global Status Report on Alcohol and Health 2011.** In.
4. Organization WH: **Investing in mental health.** 2003.
5. Organization WH: **Mental health action plan 2013-2020:** World Health Organization; 2013.
6. Prince M, Patel V, Saxena S, Maj M, Maselko J, Phillips MR, Rahman A: **No health without mental health.** *The lancet* 2007, **370**(9590):859-877.
7. Rickwood D, Thomas K, Bradford S: **Help-seeking measures in mental health: a rapid review.** 2012.
8. Reda AA, Kotz D, Biadgilign S: **Adult tobacco use practice and its correlates in eastern Ethiopia: A cross-sectional study.** *Harm reduction journal* 2013, **10**(1):28.
9. Mekonen T, Fekadu W, Chane T, Bitew S: **Problematic alcohol Use among University students.** *Frontiers in psychiatry* 2017, **8**:86.
10. Mekonen T, Fekadu W, Mekonnen TC, Workie SB: **Substance use as a strong predictor of poor academic achievement among university students.** *Psychiatry journal* 2017, **2017**.

11. Mekonnen T: **Practices of substance abuse and risky sexual behavior among Adama Science and Technology University undergraduate students in 2012/13 academic years.** *Value in health* 2015, **18**(7):A733.
12. Kohn R, Saxena S, Levav I, Saraceno B: **The treatment gap in mental health care.** *Bulletin of the World Health Organization* 2004, **82**(11):858-866.
13. Knudsen HK, Abraham AJ, Oser CB: **Barriers to the implementation of medication-assisted treatment for substance use disorders: The importance of funding policies and medical infrastructure.** *Evaluation and program planning* 2011, **34**(4):375-381.
14. Barker G: **Adolescents, social support and help-seeking behaviour.** Geneva: World Health Organization 2007.
15. Chong SA, Abdin E, Vaingankar JA, Kwok KW, Subramaniam M: **Where do People with Mental Disorders in Singapore go to for Help?** *Annals of the Academy of Medicine-Singapore* 2012, **41**(4):154.
16. Corliss HL, Grella CE, Mays VM, Cochran SD: **Drug use, drug severity, and help-seeking behaviors of lesbian and bisexual women.** *Journal of Women's Health* 2006, **15**(5):556-568.
17. Sorsdahl K, Stein DJ, Grimsrud A, Seedat S, Flisher AJ, Williams DR, Myer L: **Traditional healers in the treatment of common mental disorders in South Africa.** *The Journal of nervous and mental disease* 2009, **197**(6):434.
18. Cannavo JM, Nochajski TH: **Factors Contributing to Enrollment in Treatment Programs for Adults:** INTECH Open Access Publisher; 2012.
19. Vaswani N: **Encouraging help-seeking behavior among young men: A literature review.** *Report for the child protection committee* 2011.
20. Mackenzie CS, Scott T, Mather A, Sareen J: **Older adults' help-seeking attitudes and treatment beliefs concerning mental health problems.** *The American Journal of Geriatric Psychiatry* 2008, **16**(12):1010-1019.
21. Myers B, Fakier N, Louw J: **Stigma, treatment beliefs, and substance abuse treatment use in historically disadvantaged communities.** *African Journal of Psychiatry* 2009, **12**(3).
22. Tucker JA, Simpson CA: **The recovery spectrum: from self-change to seeking treatment.** *Alcohol Research and Health* 2011, **33**(4):371.
23. Kumesa ST, Mohammed MA, Gebremariam ET, Gelaw BK, Seifu MF: **The Prevalence and Pattern of Social Drug Abuse Among Students of Rift Valley University College, Bishoftu Campus, 2014, Bishoftu, Ethiopia.** *Journal of Pharmaceutical Care & Health Systems* 2015, **2015**.
24. Aklog GT, Girmay Tsegay T: **Assessment of substance abuse and associated factors among students of Debre Markos Poly Technique College In Debre Markos Town, East Gojjam Zone, Amhara Regional State, Ethiopia, 2013.** *Global journal of medical research* 2013, **13**(4).
25. Wilson CJ, Deane FP, Ciarrochi J, Rickwood D: **Measuring help-seeking intentions: Properties of the general help seeking questionnaire.** *Canadian Journal of Counselling and Psychotherapy/Revue canadienne de counseling et de psychothérapie* 2007, **39**(1).
26. Bøen H: **Characteristics of senior centre users—and the impact of a group programme on social support and late-life depression.** *Norsk epidemiologi* 2012, **22**(2).
27. Beusenbergh M, Orley JH, Organization WH: **A User's guide to the self reporting questionnaire (SRQ).** 1994.
28. Mojtabai R, Olfson M, Mechanic D: **Perceived need and help-seeking in adults with mood, anxiety, or substance use disorders.** *Archives of general psychiatry* 2002, **59**(1):77-84.
29. Compton WM, Thomas YF, Stinson FS, Grant BF: **Prevalence, correlates, disability, and comorbidity of DSM-IV drug abuse and dependence in the United States: results from the**

- national epidemiologic survey on alcohol and related conditions.** *Archives of general psychiatry* 2007, **64**(5):566-576.
30. Dickey B, Normand S-LT, Weiss RD, Drake RE, Azeni H: **Medical morbidity, mental illness, and substance use disorders.** *Psychiatric Services* 2002, **53**(7):861-867.
